# Supplementary material for: Selection and preliminary application of a single stranded DNA aptamer targeting colorectal cancer serum
Source: Royal Society of Chemistry journal article supplement (doi:10.1039/c9ra04777h), 2019-01-01
Supplement: c9ra04777h1.pdf [file c9ra04777h1.pdf]

## Selection and preliminary application of a single stranded DNA aptamer targeted colorectal cancer serum

Kun Li<sup>abc\*</sup>, Liqing Qi<sup>abc</sup>, LiMing Gao<sup>d</sup>, Ming Shi<sup>abc</sup>, Jian Li<sup>abc</sup>, ZhiWei Liu<sup>abc</sup>, Lu  
 Zhao<sup>ab</sup>

Table S1. Screening parameters of aptamers against the serum targets of colorectal  
 cancer patients through SELEX technique

| Round | Volume of<br>magnetic<br>beads (mL) | Amount of<br>the initial<br>ssDNA<br>library (μg) | Total amount of<br>mixed serum<br>after treatment<br>(μL) | ssDNA<br>library<br>incubation<br>time (min) | Washing buffer   | Number<br>of<br>washing | Amount of<br>recovery<br>ssDNA<br>(μg) |
|-------|-------------------------------------|---------------------------------------------------|-----------------------------------------------------------|----------------------------------------------|------------------|-------------------------|----------------------------------------|
| 1     | 4                                   | 31.40                                             | 1000                                                      | 60                                           | PBS              | 3                       | 0.52                                   |
| 2     | 2                                   | 28.95                                             | 600                                                       | 60                                           | PBS              | 5                       | 0.86                                   |
| 3     | 2                                   | 26.49                                             | 350                                                       | 50                                           | PBS+0.02%Tween20 | 3                       | 0.94                                   |
| 4     | 1.8                                 | 24.68                                             | 300                                                       | 50                                           | PBS+0.02%Tween20 | 5                       | 1.12                                   |
| 5     | 1.8                                 | 22.87                                             | 275                                                       | 50                                           | PBS+0.05%Tween20 | 3                       | 1.25                                   |
| 6     | 1.6                                 | 21.54                                             | 250                                                       | 40                                           | PBS+1%Tween20    | 3                       | 1.48                                   |
| 7     | 1.6                                 | 18.65                                             | 225                                                       | 40                                           | PBS+1%Tween20+   | 5                       | 1.75                                   |
|       |                                     |                                                   |                                                           |                                              | 0.004% SWCNT     |                         |                                        |
| 8     | 1.5                                 | 15.32                                             | 200                                                       | 40                                           | PBS+1.5%Tween20+ | 3                       | 1.98                                   |
|       |                                     |                                                   |                                                           |                                              | 0.004% SWCNT     |                         |                                        |
| 9     | 1.3                                 | 12.98                                             | 175                                                       | 30                                           | PBS+2%Tween20    | 5                       | 2.55                                   |
|       |                                     |                                                   |                                                           |                                              | +0.008% SWCNT    |                         |                                        |
| 10    | 1                                   | 12.69                                             | 150                                                       | 30                                           | PBS+2%Tween20    | 5                       | 2.48                                   |
|       |                                     |                                                   |                                                           |                                              | +0.008% SWCNT    |                         |                                        |

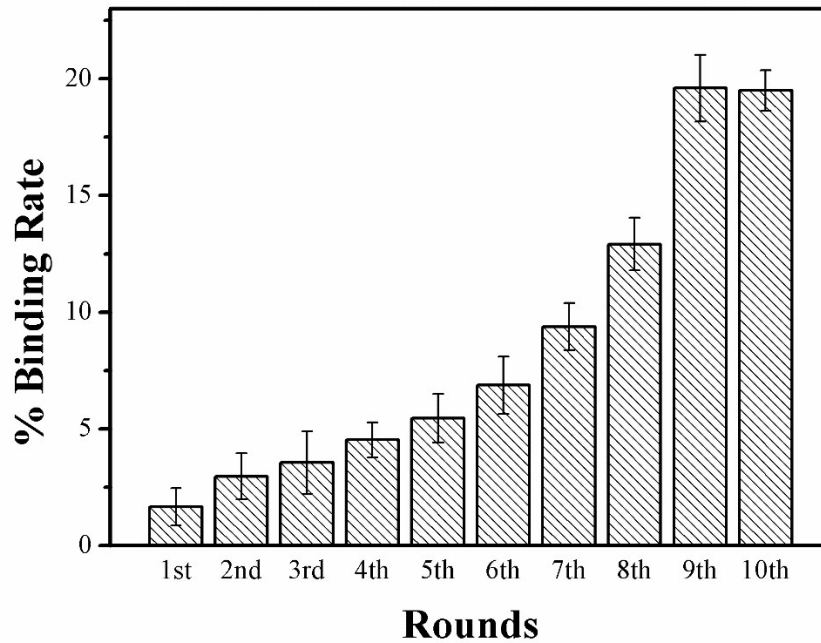

Fig.S1 The recovery rate of each circle during the whole screening process. The amounts of ssDNA recovered in the first 9 rounds were rising up continuously, and there is no evident difference in the 10th round in comparison to the ninth round, which proved the success of the screening. Error bars represent standard deviation from triplicate analysis.

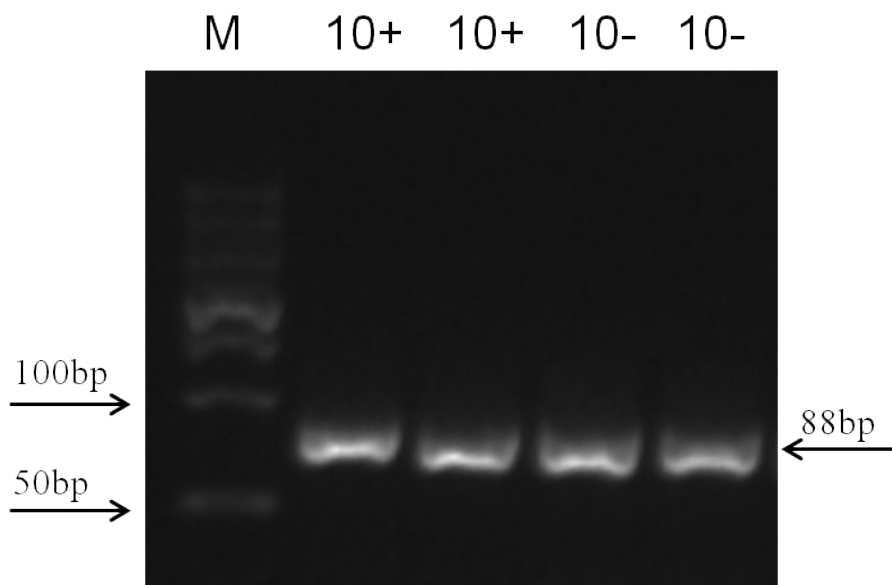

Fig.S2 Gel electrophoresis imaging of PCR amplification products of collected

ssDNA in round 10. The PCR amplification product of collected ssDNA in the colorectal cancer group ran in two parallel 10+ lanes and the PCR amplification product of collected ssDNA in the healthy group ran in two parallel 10- lanes .

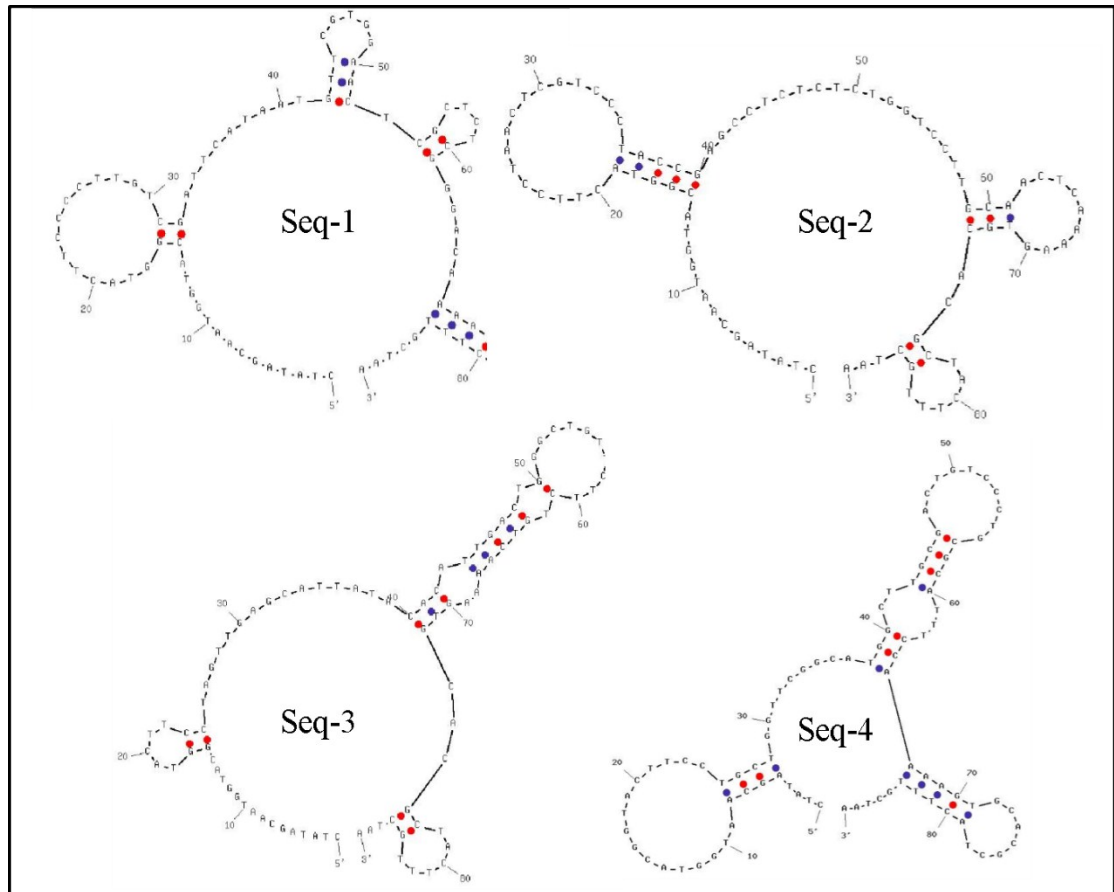

Figure S3. Predicted secondary structure of four candidate aptamers in 37°C with IDT.
